# Supplementary material for: Sensing complementary temporal features of odor signals enhances navigation of diverse turbulent plumes
Source: eLife journal article supplement (doi:10.7554/elife.72415), 2022-01-24
Supplement: supp [file elife-72415-supp-v1.zip]

Archive with 4 entries (4 files):
- elife_poa_e72415_Figure_3_figure_supplement_1.pdf
- elife_poa_e72415_Figure_4_figure_supplement_1.pdf
- elife_poa_e72415_Figure_4_figure_supplement_2.pdf
- elife_poa_e72415_Transparent_Reporting_File.pdf
