# Supplementary material for: Sensing complementary temporal features of odor signals enhances navigation of diverse turbulent plumes
Source: eLife journal article supplement (doi:10.7554/elife.72415), 2022-01-24

**A**

Odor signal

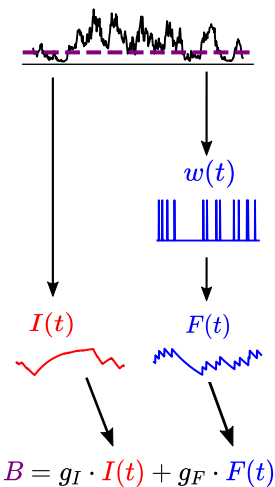

$$P(\text{turn}) \sim \text{Pois}(\lambda)$$

$$P(\text{upwind}|\text{turn}) = \frac{1}{1 + e^{-B}}$$

**B**

High intermensity plume

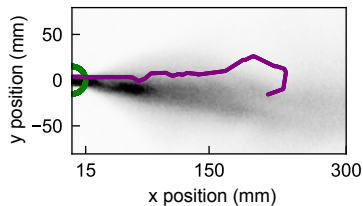

High frequency plume

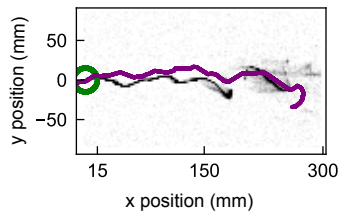**C**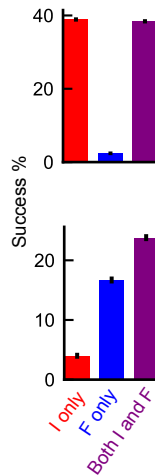**D** $P(\text{Initial condition} | \text{successful})$ 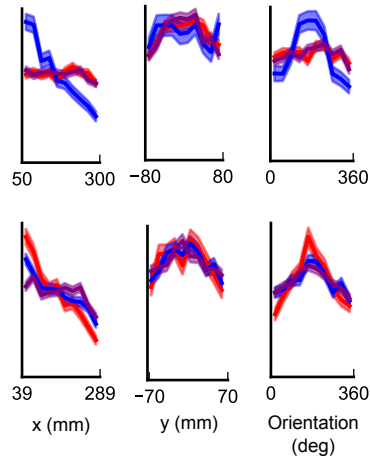**E**

High intermensity plume

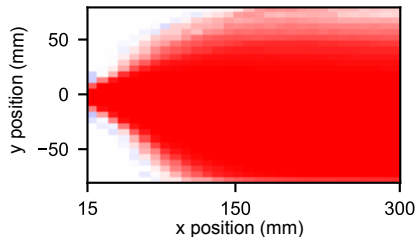

High frequency plume

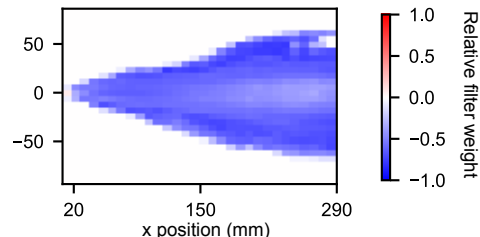

Supplement: supp [file elife-72415-supp-v1.zip › elife_poa_e72415_Figure_3_figure_supplement_1.pdf]
