# Supplementary figures and images for: Sensing complementary temporal features of odor signals enhances navigation of diverse turbulent plumes
Source: eLife journal article supplement (doi:10.7554/elife.72415), 2022-01-24

**A**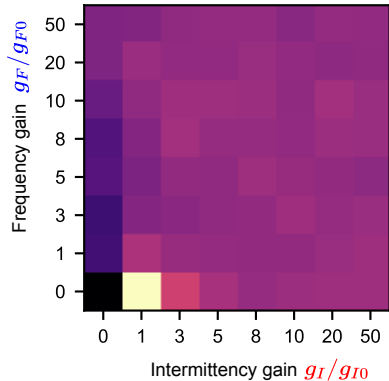**B**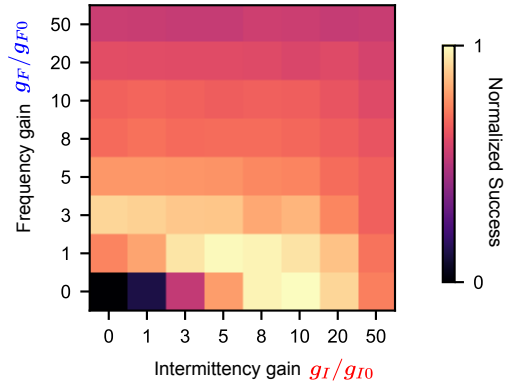

Supplement: supp [file elife-72415-supp-v1.zip › elife_poa_e72415_Figure_4_figure_supplement_1.pdf]

**A**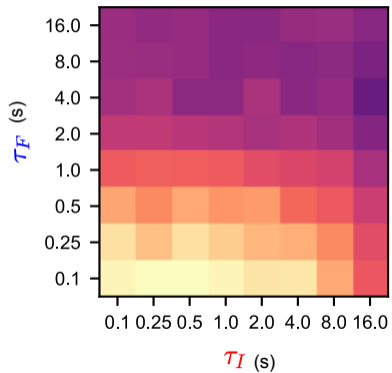**B**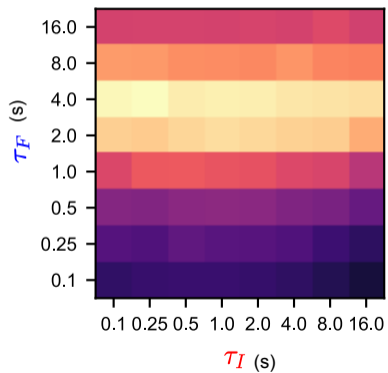**C**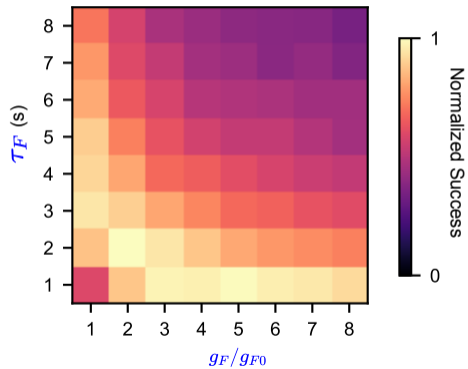

Supplement: supp [file elife-72415-supp-v1.zip › elife_poa_e72415_Figure_4_figure_supplement_2.pdf]
